# Supplementary material for: An actuatable ionogel thermoelectric fiber with aligned mesogens-induced unprecedented thermopower for four-dimensional dynamically adaptive heat harvesting
Source: Research Square preprint supplement (doi:10.21203/rs.3.rs-5606102/v1), 2024-12-17
Supplement: Supplementary file 1 [file bcfcdd91a1e107ca0b22bc5f.docx]

**Supporting Information**

**An actuatable ionogel thermoelectric fiber with aligned mesogens-induced unprecedented thermopower for four-dimensional dynamically adaptive heat harvesting**

**Liuqi Cao1†, Tingting Sun2†*, Huiru Zhao1, MengHan Shang1, Lianjun Wang1,3* & Wan Jiang1,4***

1State Key Laboratory for Modification of Chemical Fibers and Polymer Materials, College of Materials Science and Engineering, Donghua University, 201620 Shanghai, China.

2College of Biological Science and Medical Engineering, Donghua University, 201620 Shanghai, China.

3Engineering Research Center of Advanced Glasses Manufacturing Technology, Ministry of Education, Donghua University, 201620 Shanghai, China.

4Institute of Functional Materials, Donghua University, 201620 Shanghai, China.

e-mail: [Tingtingsun@dhu.edu.cn](mailto:Tingtingsun@dhu.edu.cn); [wanglj@dhu.edu.cn](mailto:wanglj@dhu.edu.cn); [wanjiang@dhu.edu.cn](mailto:wanjiang@dhu.edu.cn)


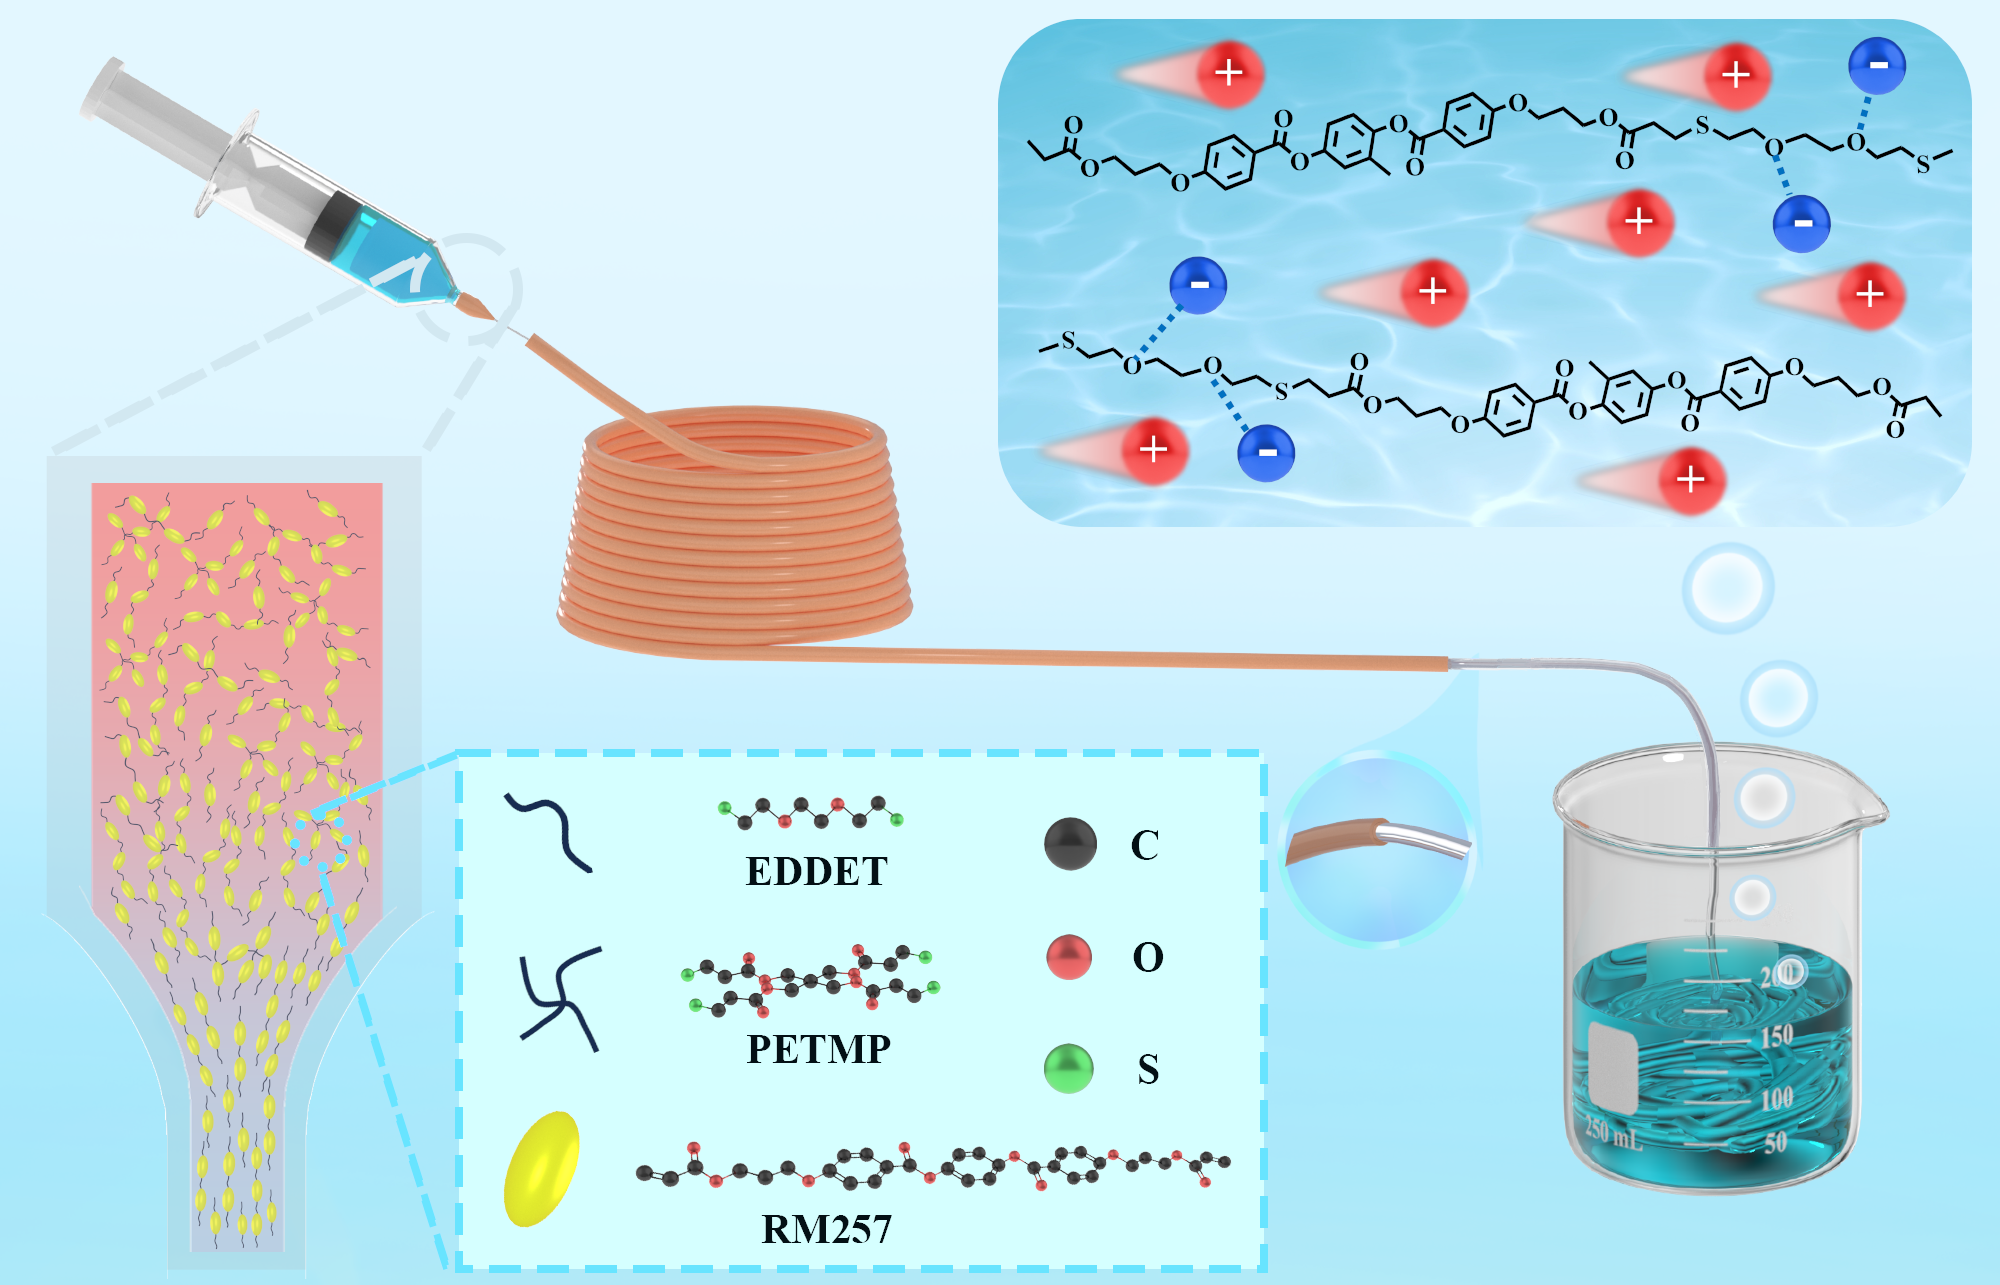


**Fig. S1** Preparation diagram of LCE-based ionic thermoelectric fibers


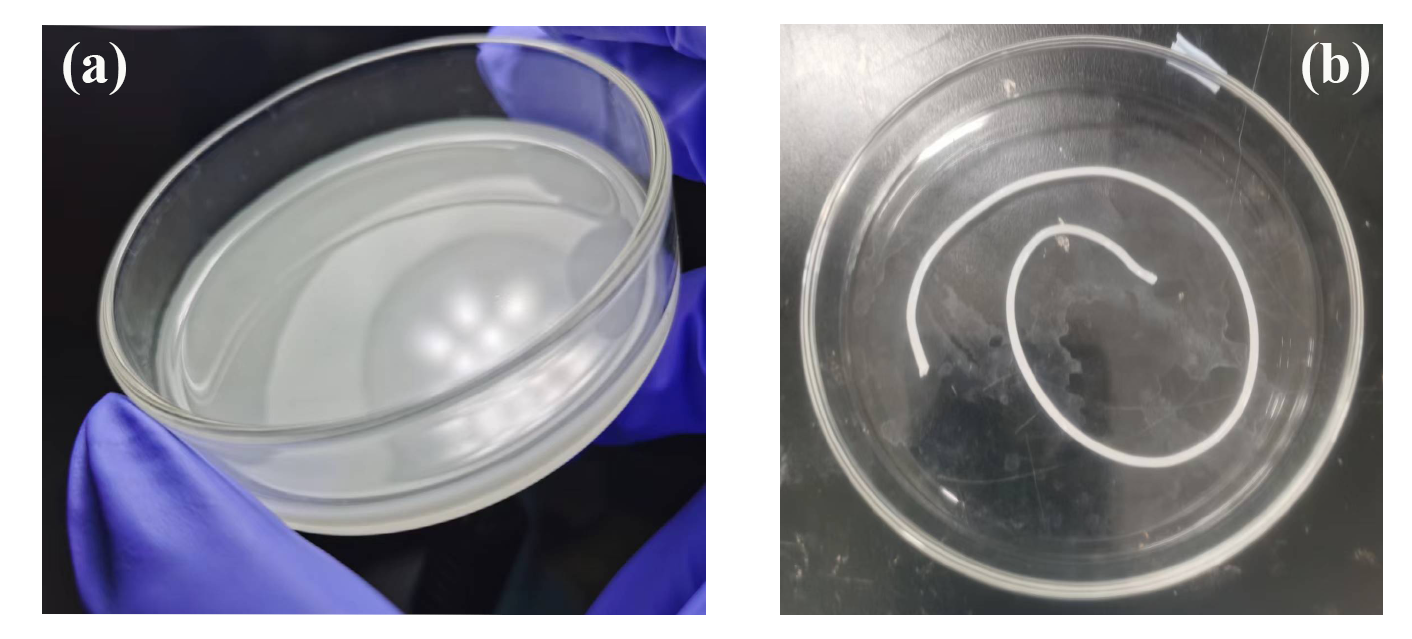


**Fig. S2** LCE-based ionic thermoelectric films (a) and fibers (b) prepared by a one-step synthesis method

**
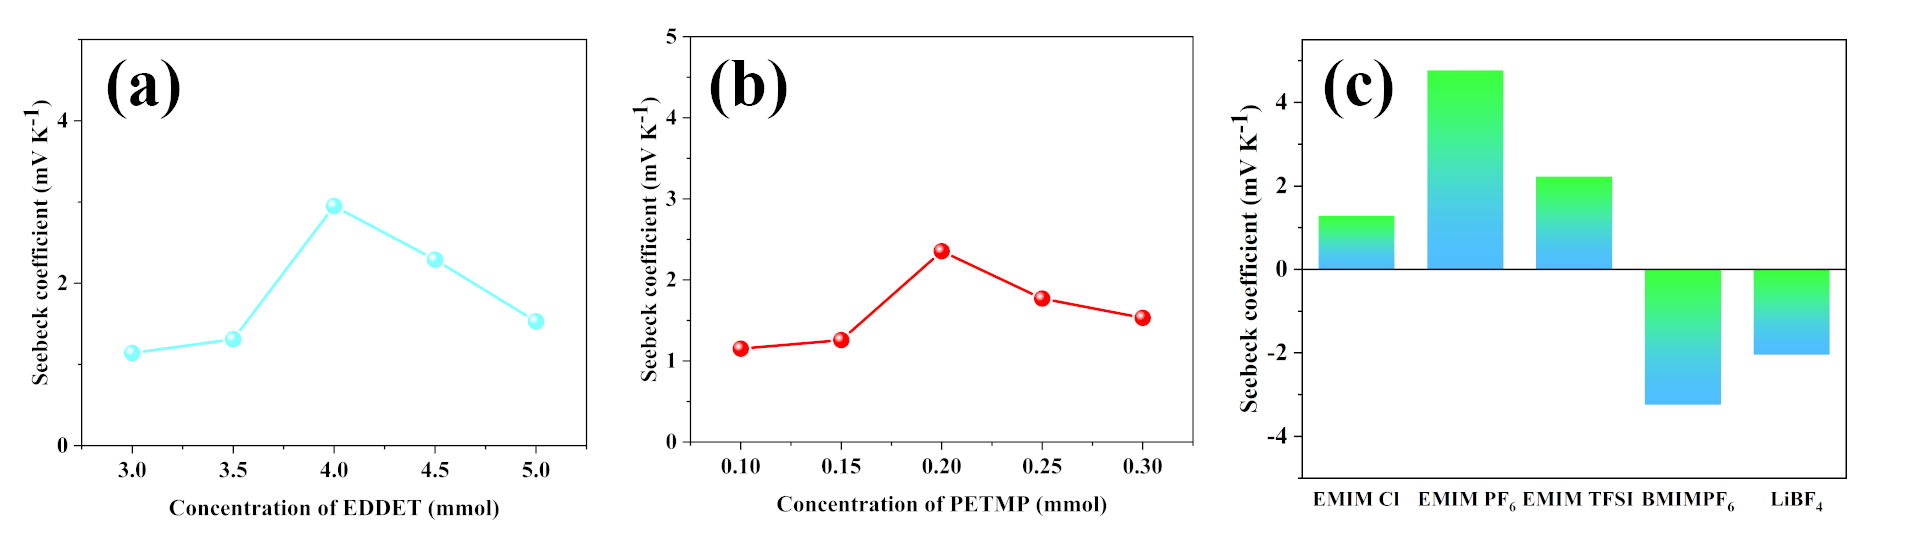
**

**Fig. S3** Thermoelectric properties of LCE i-TE fibers obtained by one-step synthesis with different compositional elements. (a-b) Seebeck coefficient of LCE i-TE fibers synthesized with different concentration of EDDET and PETMP. (c) Seebeck coefficient of LCE fibers synthesized with different types of ionic liquids.

**
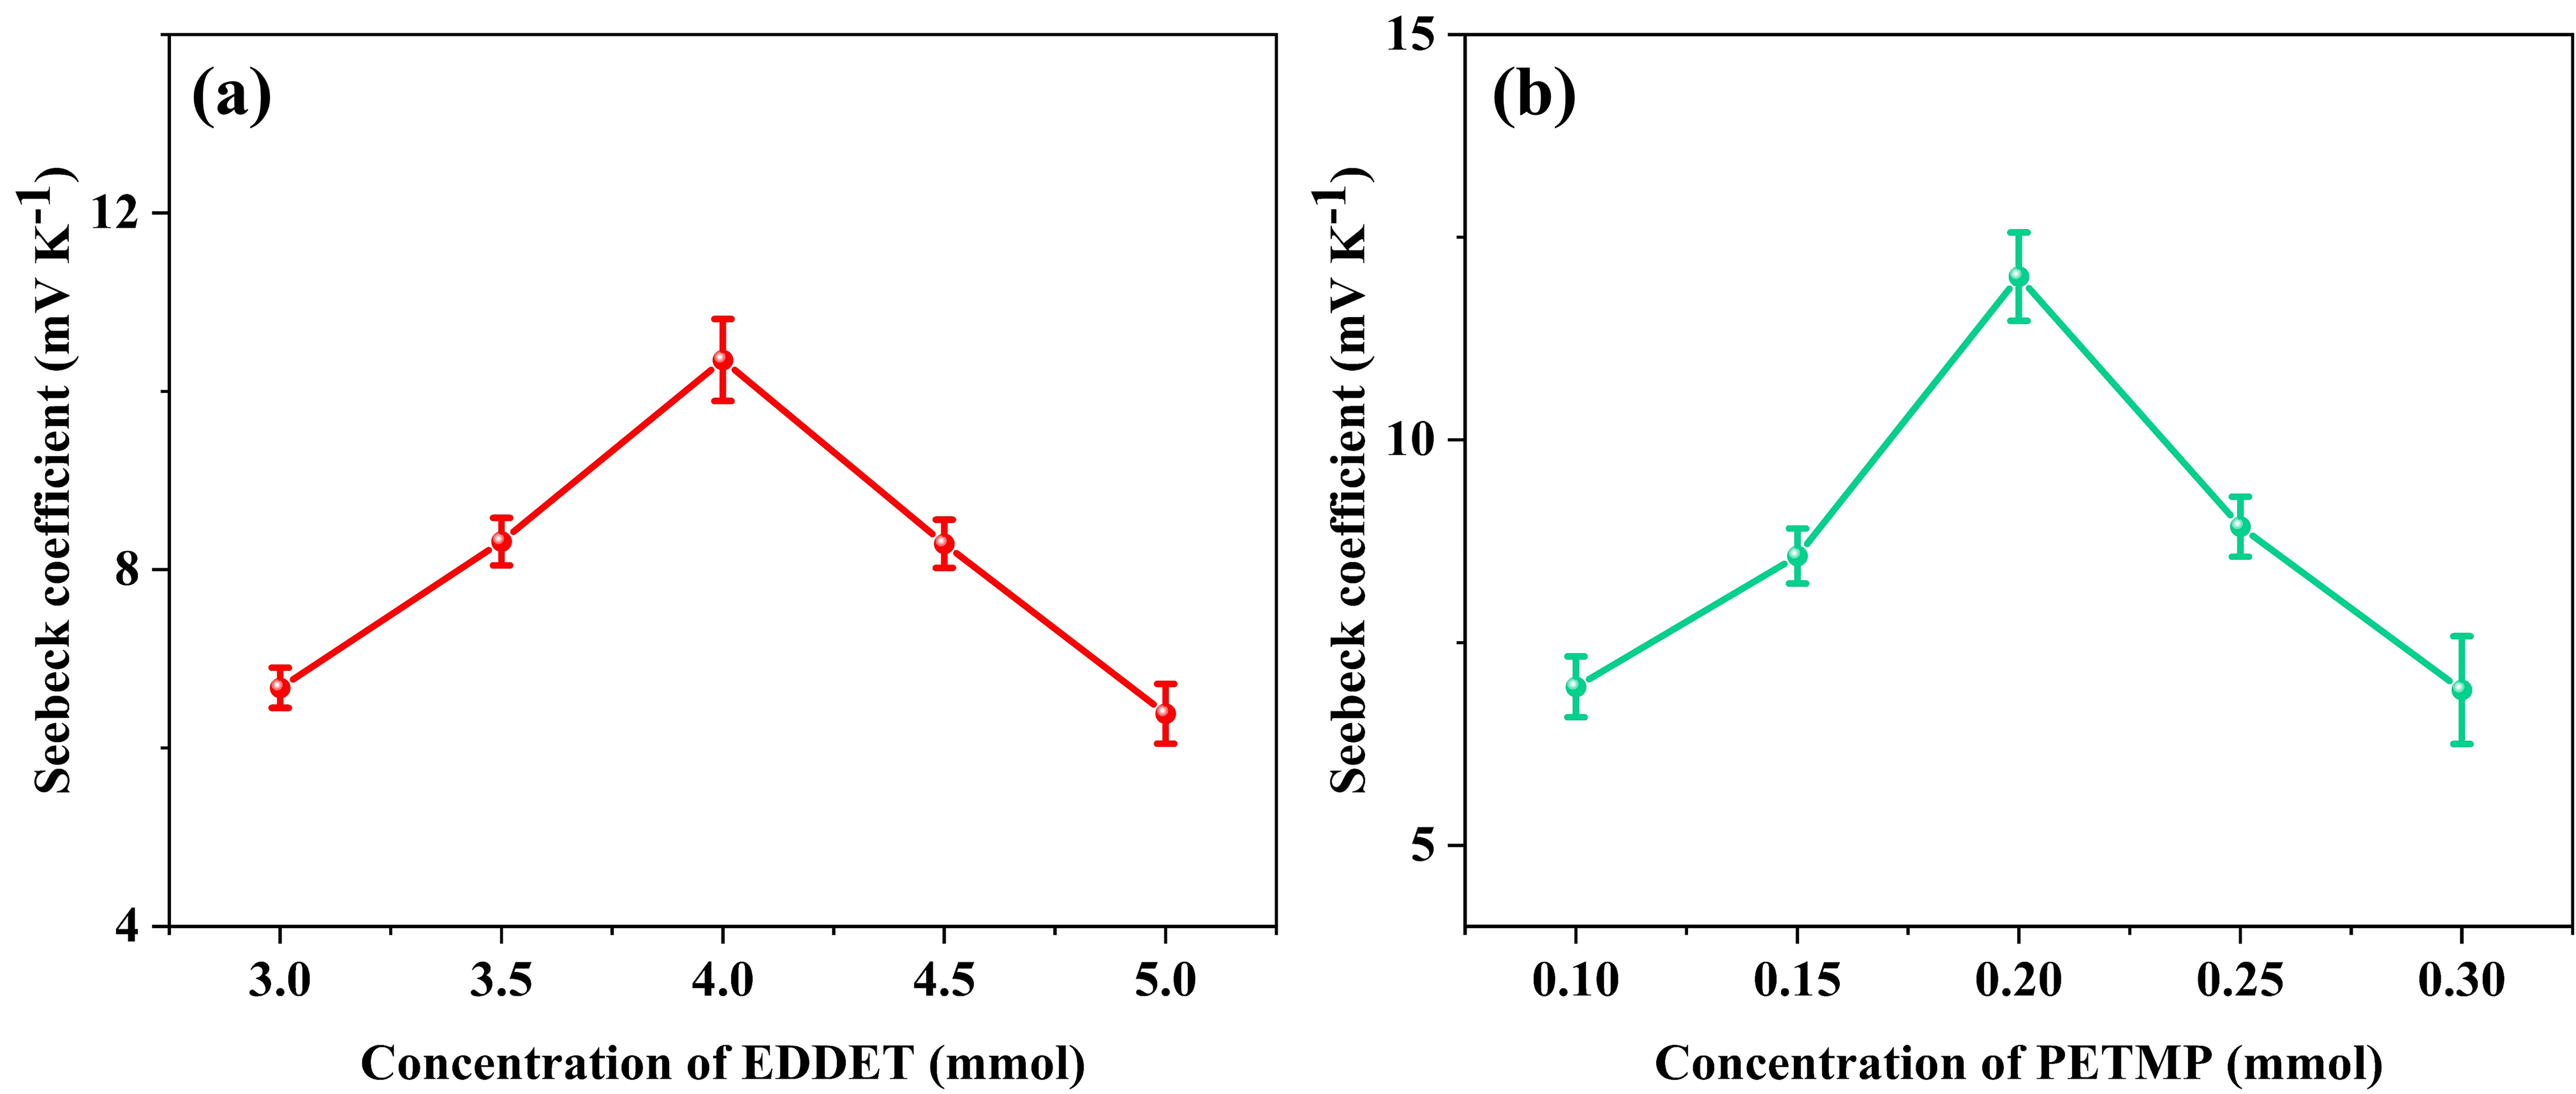
**

**Fig. S4** Thermoelectric properties of LCE i-TE fibers obtained by solution impregnation method with different compositional elements. (a-b) Seebeck coefficient of LCE i-TE fibers synthesized with different concentration of EDDET and PETMP.

**
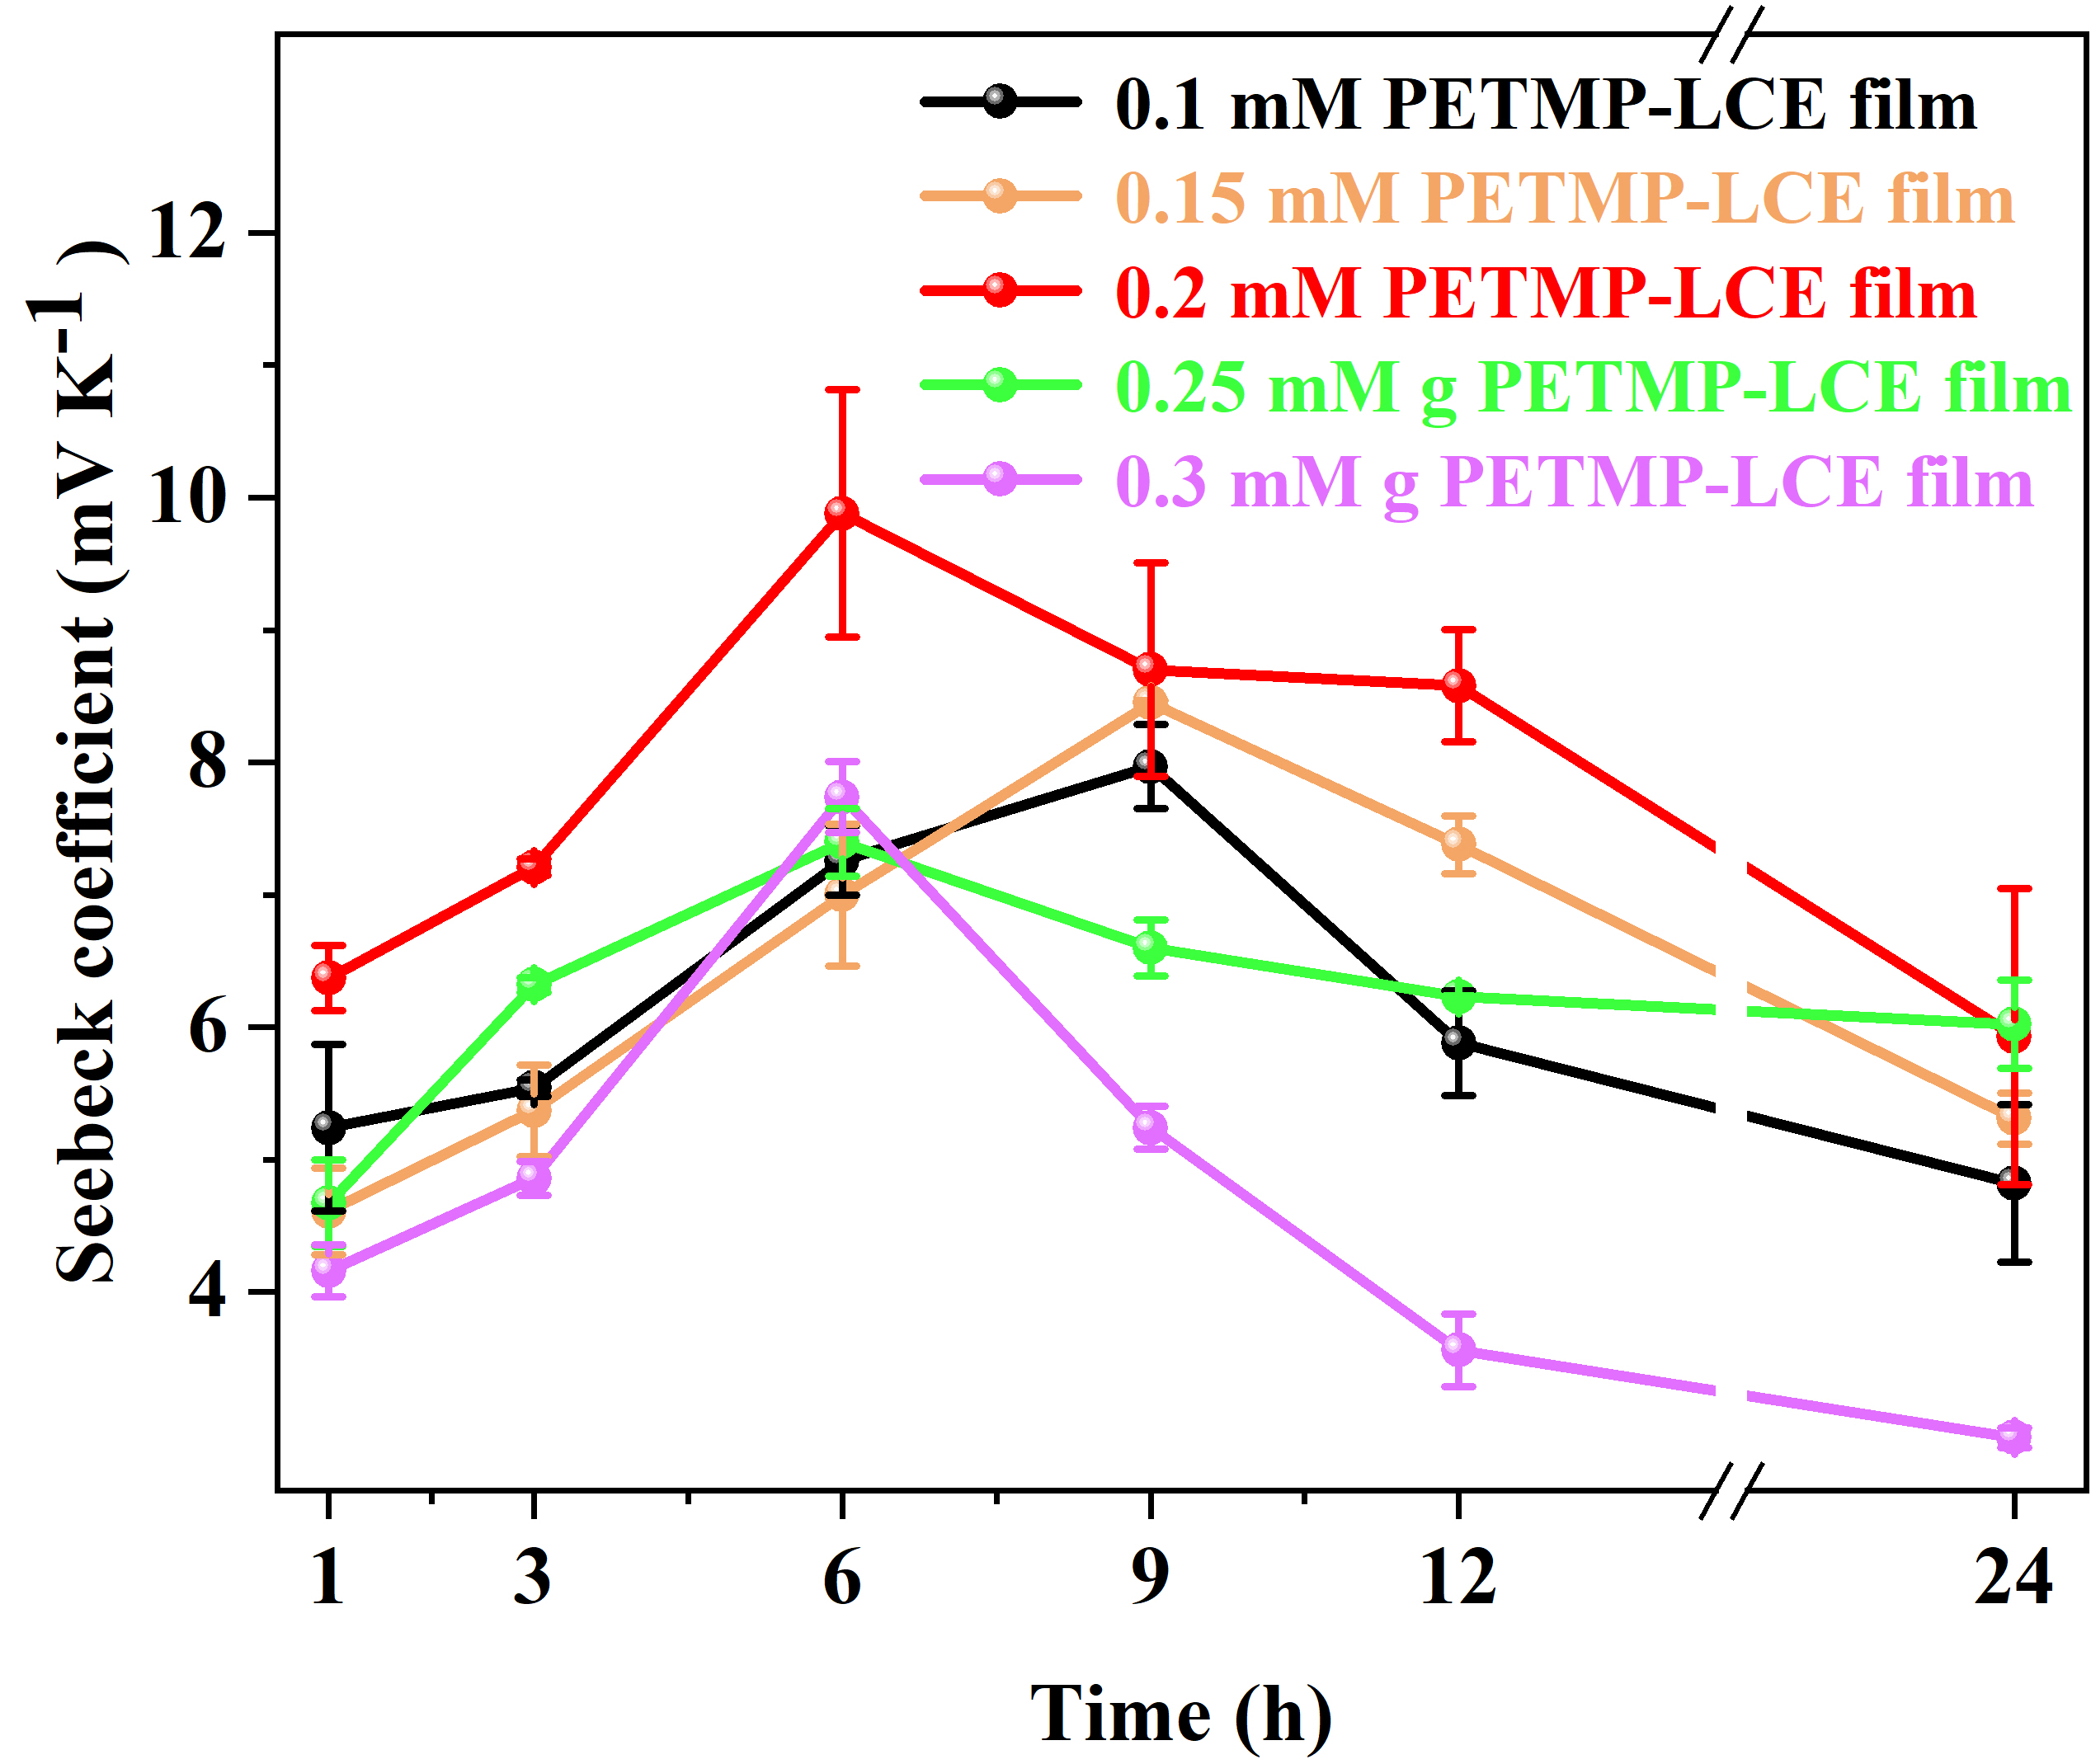
**

**Fig. S5** Seebeck coefficient of LCE i-TE films with different concentration of PETMP at different impregnation time.


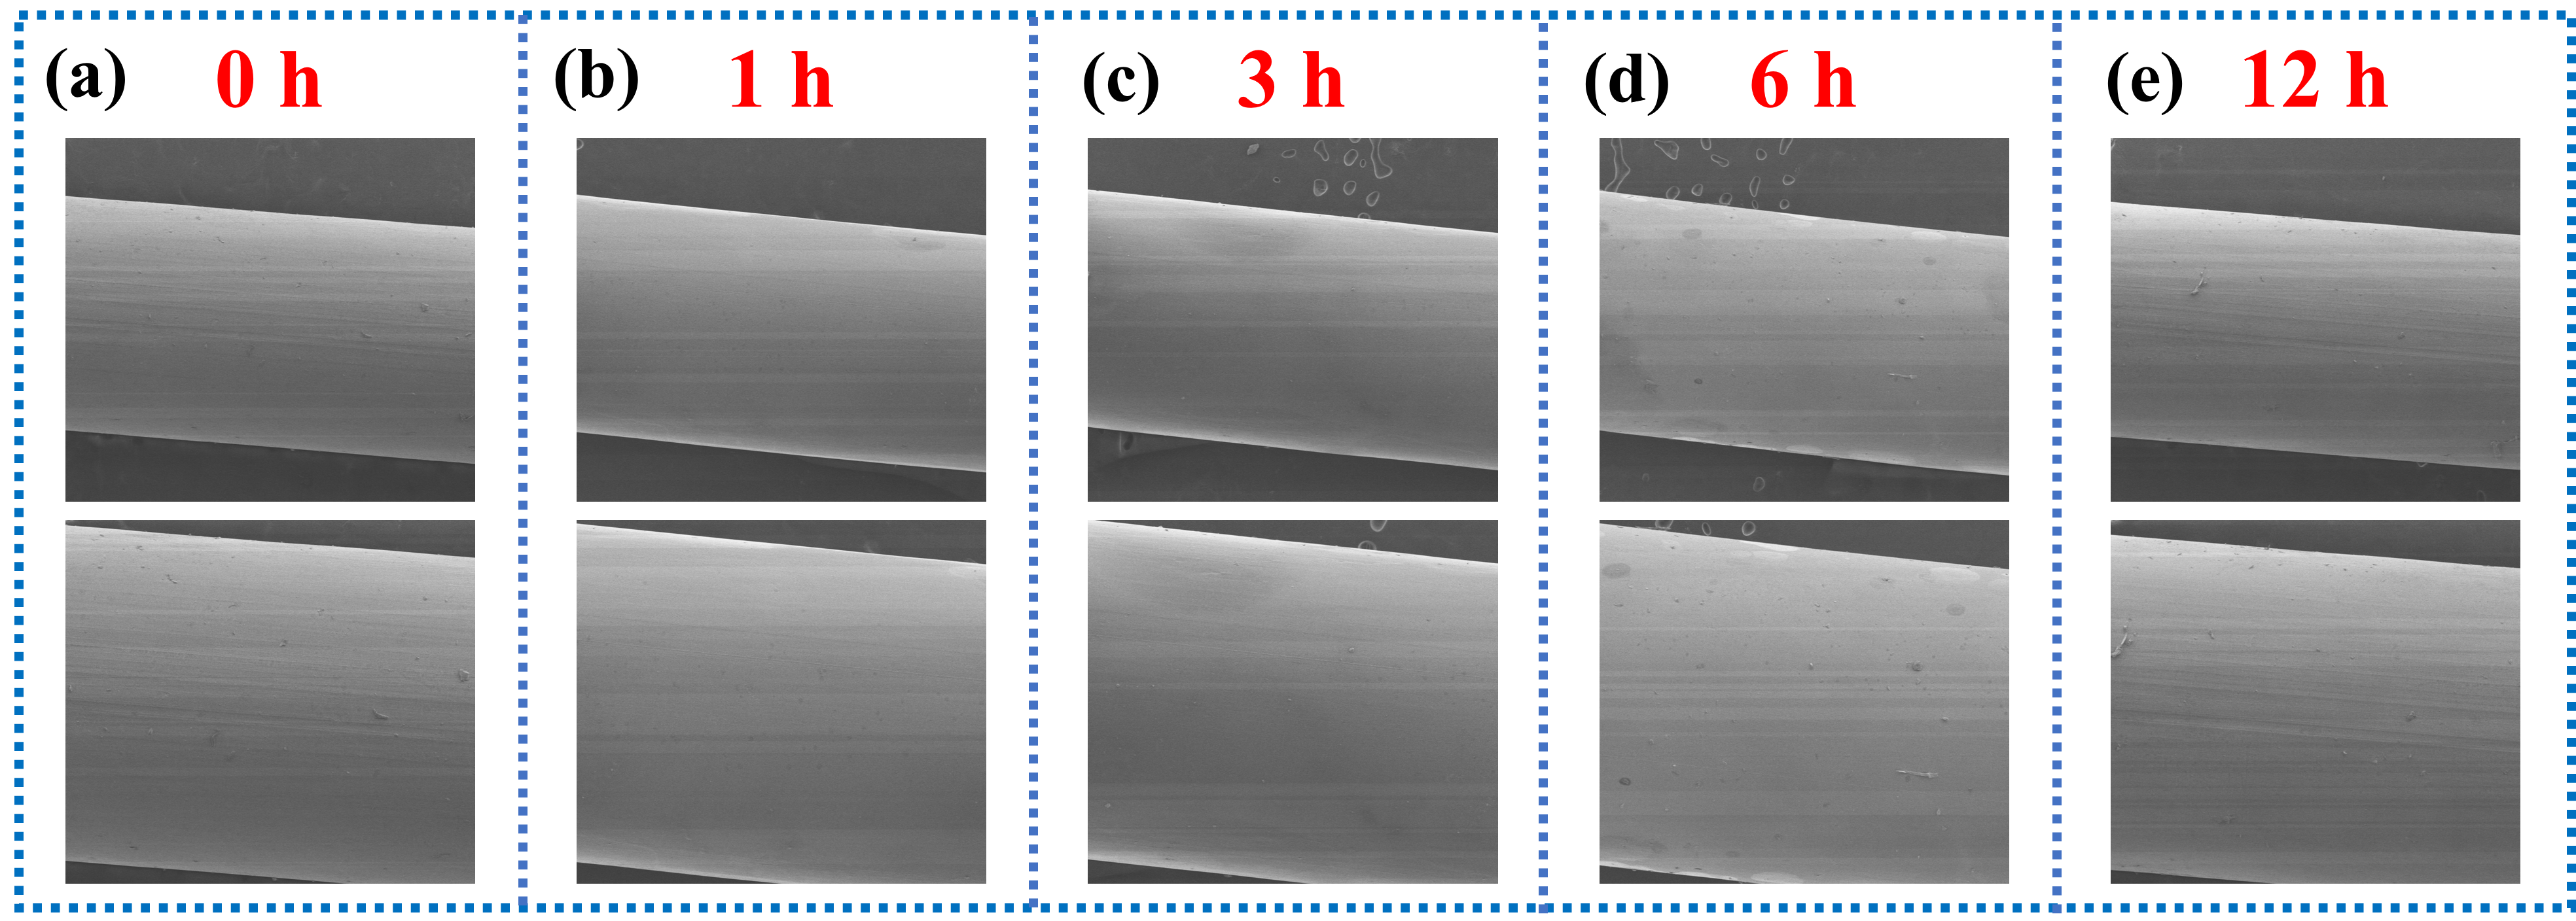


**Fig. S6** SEM images of LCE i-TE fibers at different immersion time (a) 0h, (b) 1h, (c) 3h, (d) 6h, (e) 12h.





**Fig. S7** Tensile stress-strain curves at stretching rate of 50 mm·min-1 of LCE i-TE films with different impregnation time.

**
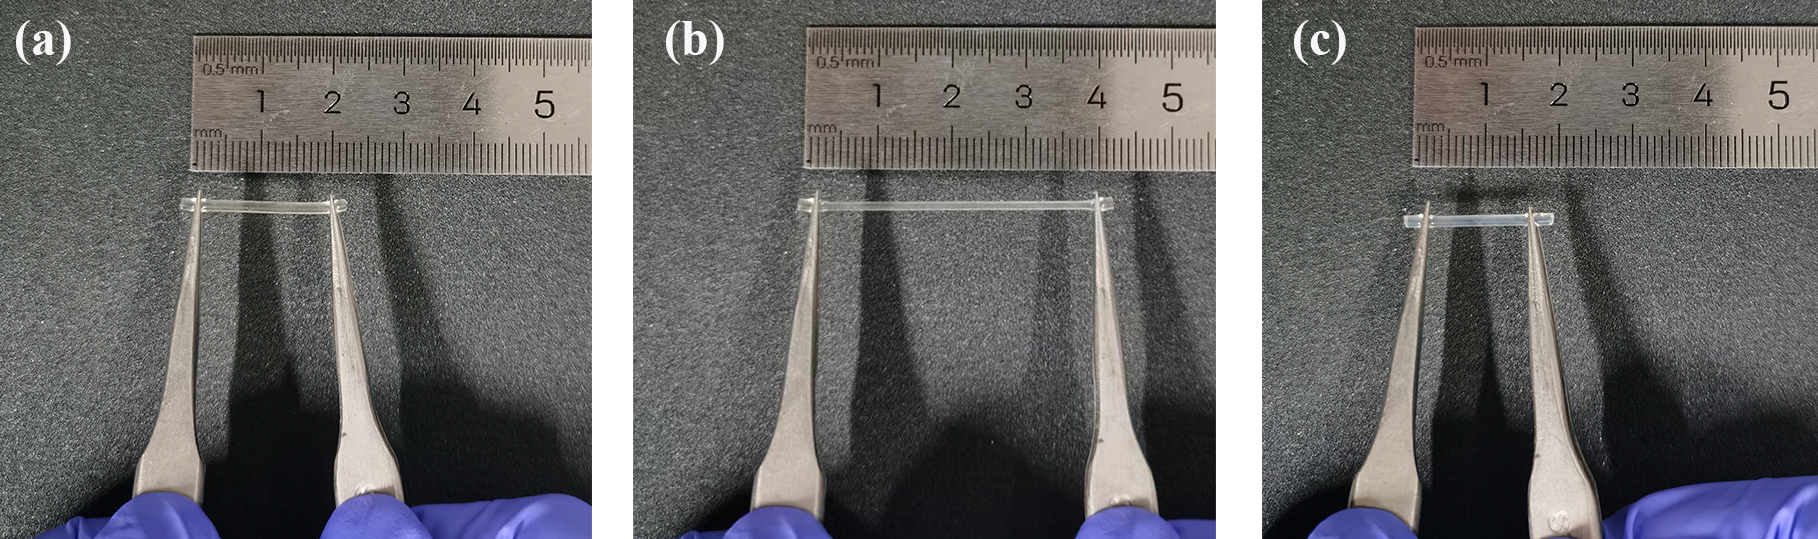
**

**Fig. S8** LCE-based ionic thermoelectric fibers tensile rebound test (a) Stretch 0%, (b) Stretch 100%, (c) rebound 100%.

**
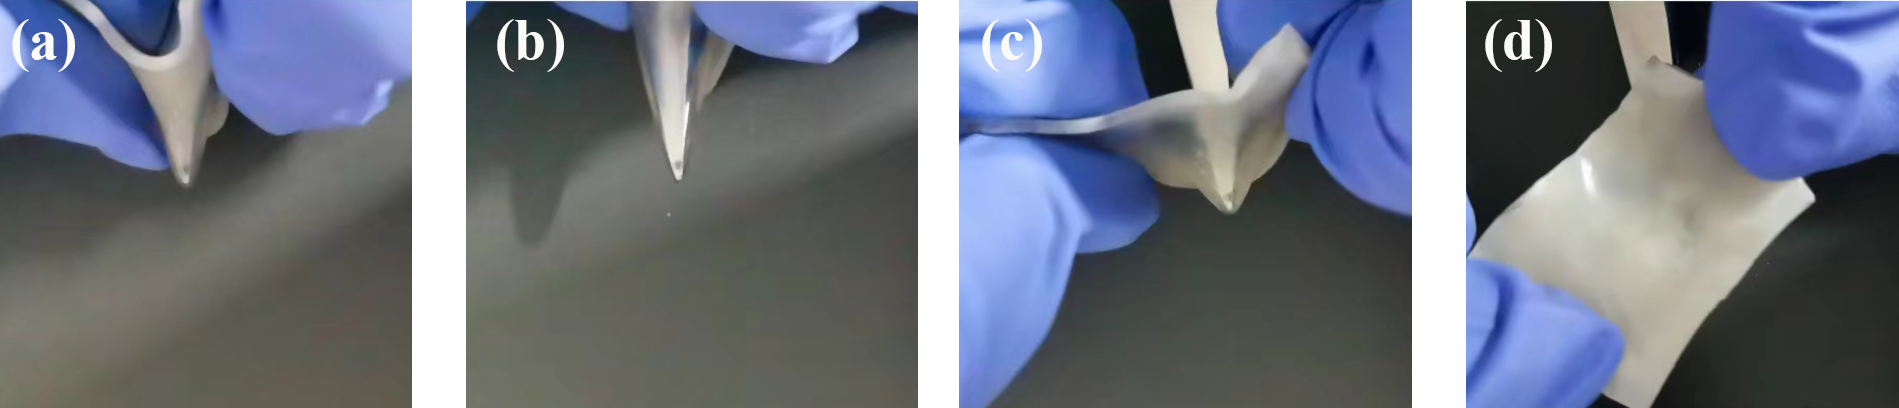
**

**Fig. S9** Tear resistance testing of LCE-based ionic thermoelectric films (a-d).

**

**

**Fig. S10** DSC curves of i-TE fibers.


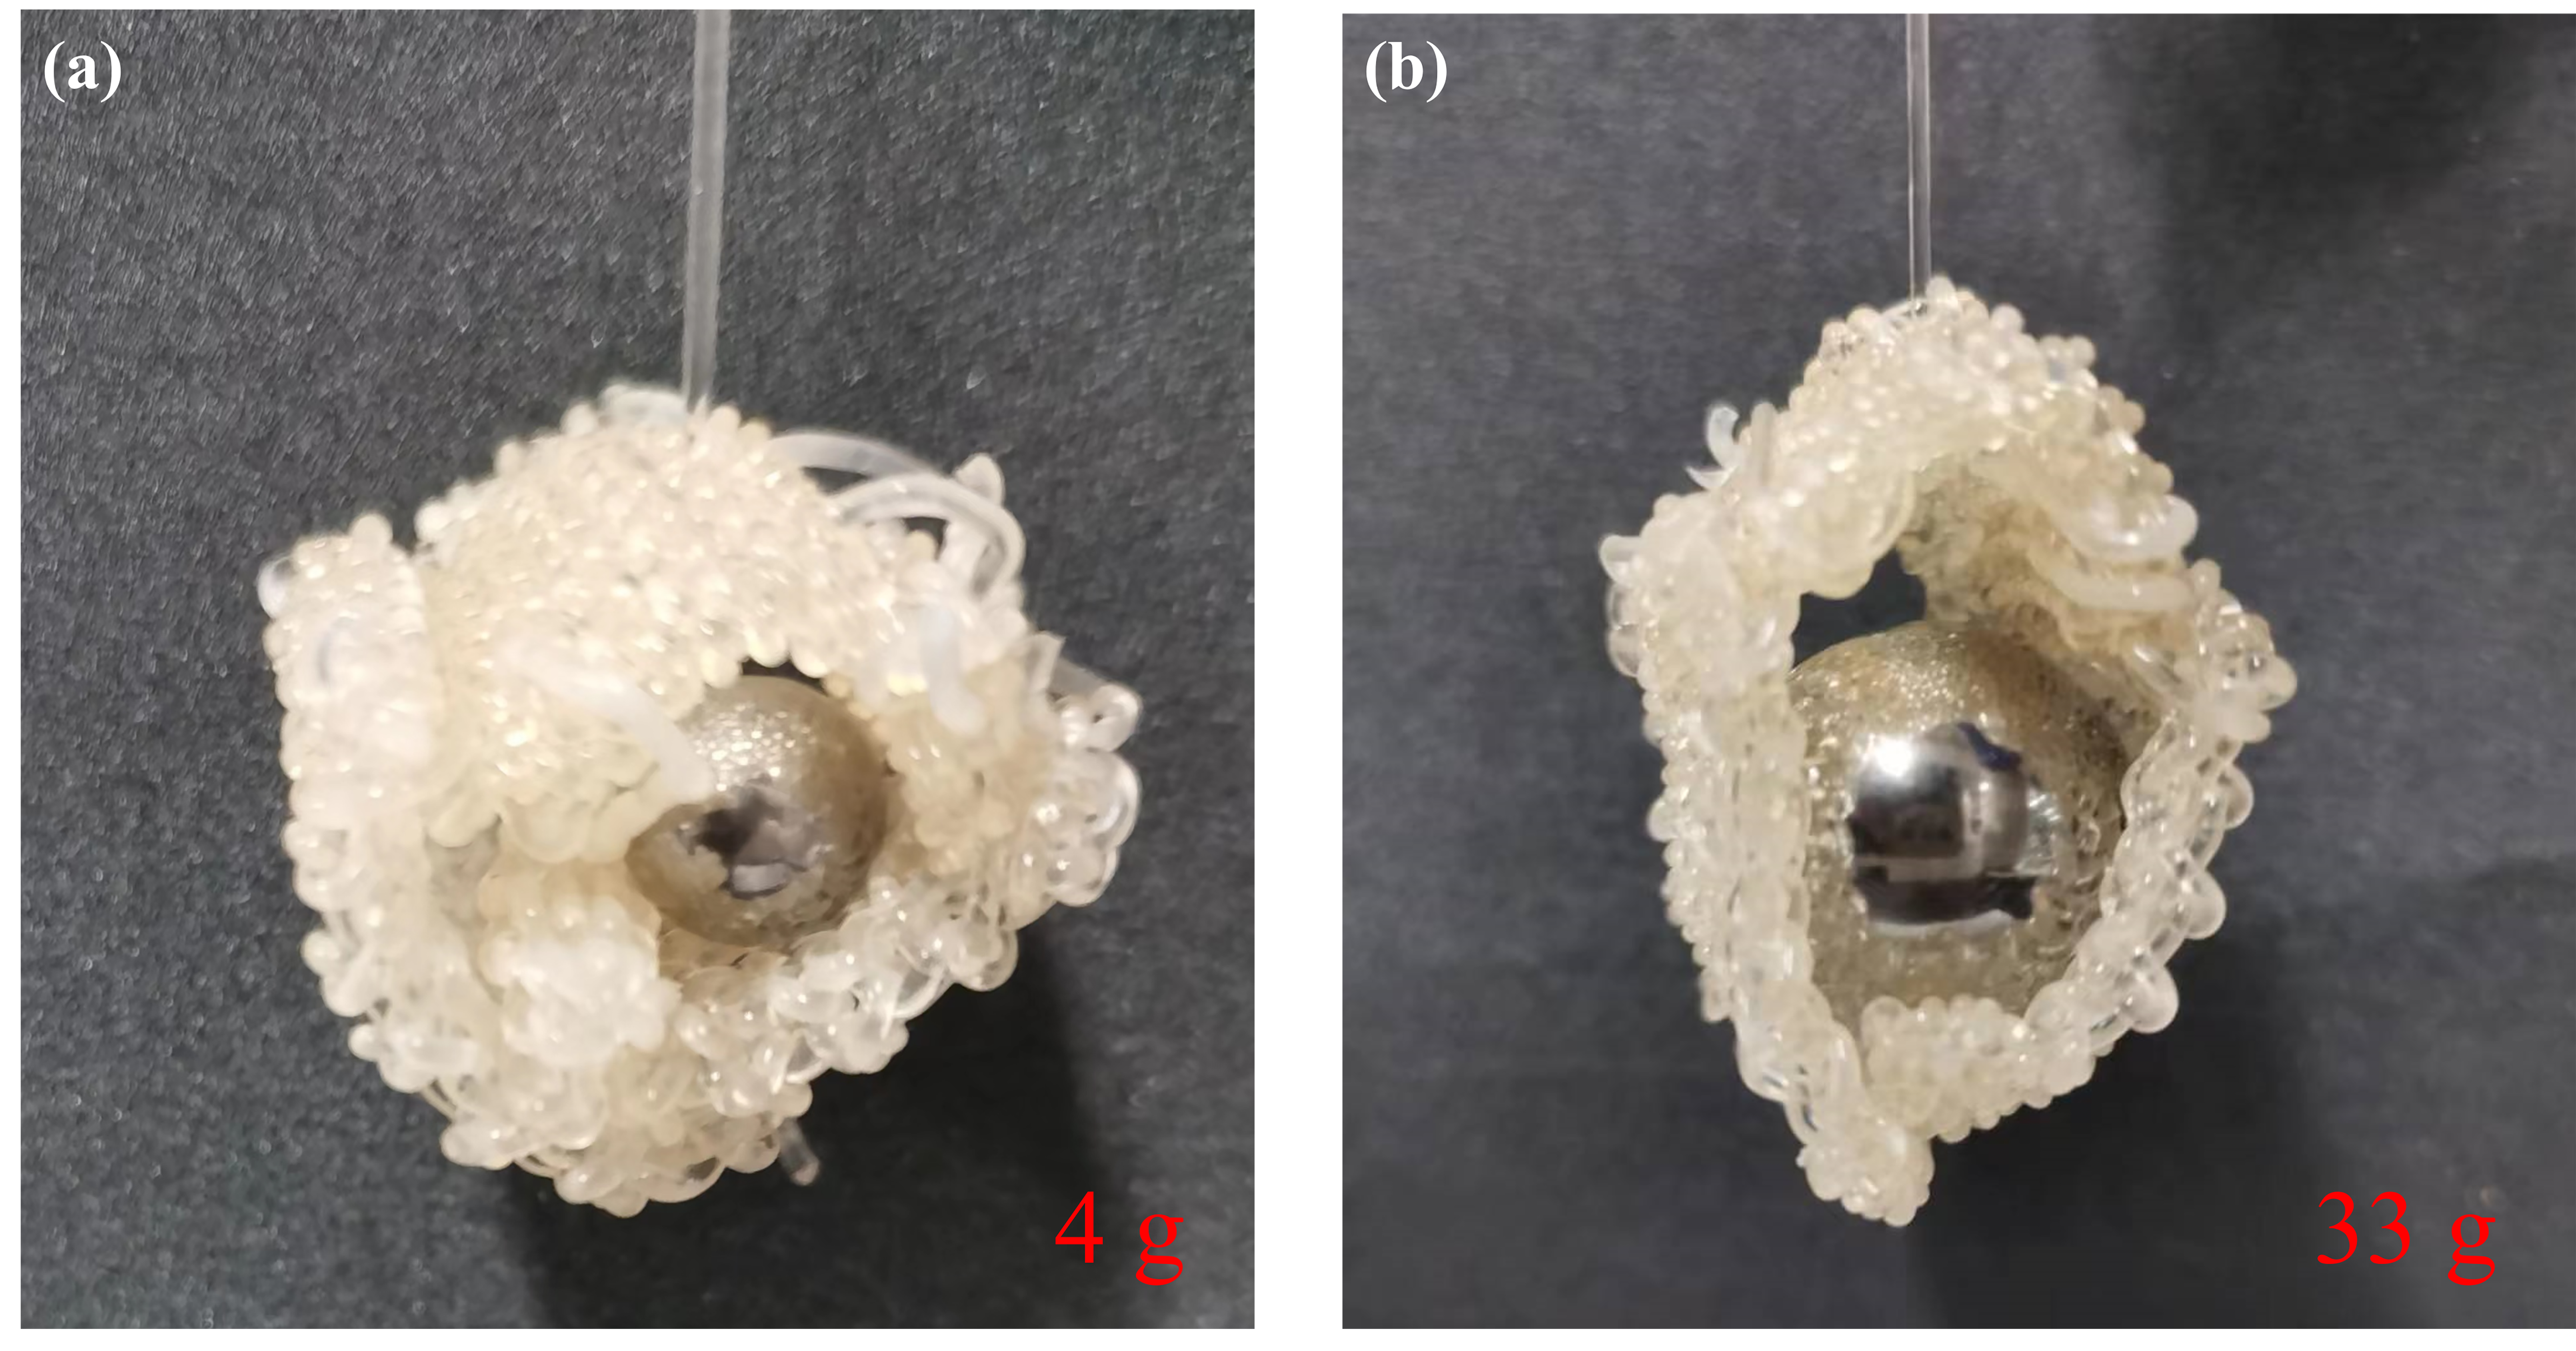


**Fig. S11** Gripping of 4 g (a) and 33 g (b) steel balls by double-armed 4DCRT i-TE device
